# Supplementary material
Source: PubMed Central journal article supplement (PMC4469491)

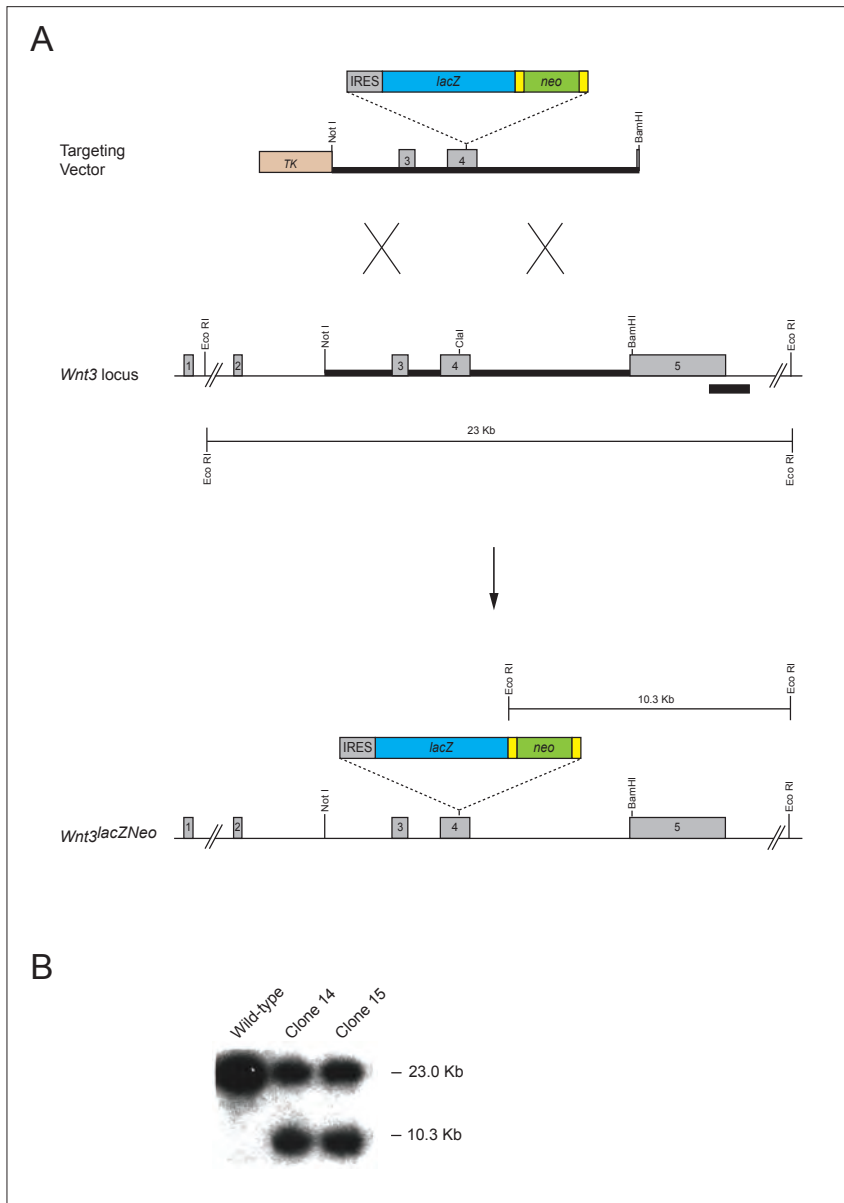

Supplementary Figure 1

Supplement: NIHMS691048-supplement-1.pdf [file NIHMS691048-supplement-1.pdf]
